# Supplementary material for: Spin mixed charge transfer states of iridium complex Ir(ppy)3: transient absorption and time-resolved photoluminescence
Source: Royal Society of Chemistry journal article supplement (doi:10.1039/c5ra01404b), 2015-01-01
Supplement: c5ra01404b1.pdf [file c5ra01404b1.pdf]

## Supplementary Information

### Spin Mixed Charge Transfer States of Iridium Complex Ir(ppy)<sub>3</sub>: Transient Absorption and Time-Resolved Photoluminescence

Mohan Singh Mehata<sup>†,\*</sup>, Yang Yang<sup>†</sup>, Zongjing Qu<sup>†</sup>, Jun-sheng Chen<sup>†</sup>, Feng-jiao Zhao<sup>†</sup> and Ke-Li Han<sup>†\*</sup>

<sup>†</sup>State Key Laboratory of Molecular Reaction Dynamics, Dalian Institute of Chemical Physics (DICP),  
Chinese Academy of Sciences, Dalian 116023, CHINA.

<sup>‡</sup>Laser-Spectroscopy Laboratory, Department of Applied Physics, Delhi Technological University, Bawana  
Road, Delhi 110042, INDIA.

\*To whom correspondence should be sent: E-mail: (M.S. Mehata) [msmehata@gmail.com](mailto:msmehata@gmail.com); (Ke-Li Han)

[klhan@dicp.ac.cn](mailto:klhan@dicp.ac.cn).

**Table S1: The tri-exponential fitted parameters of transient absorption dynamical curve of Ir (ppy)<sub>3</sub> (pumped wavelength was 355 nm).**

| <b>Wavelength (nm)</b> | <b>Parameter</b> | <b>Value (<math>\tau</math> in <math>\mu</math>s)</b> | <b>Standard Error</b> |
|------------------------|------------------|-------------------------------------------------------|-----------------------|
| 370                    | y0               | 0.00122                                               | 3.26E-05              |
|                        | A1               | -414.13                                               | 659.0228              |
|                        | t1               | 1.717414                                              | 0.010636              |
|                        | A2               | -407.158                                              | 863.7066              |
|                        | t2               | 1.705352                                              | 0.011175              |
|                        | A3               | 821.2928                                              | 369.2865              |
|                        | t3               | 1.711387                                              | 0.012478              |
| 410                    | y0               | 3.90E-04                                              | 3.26E-05              |
|                        | A1               | 685.8815                                              | 1092.607              |
|                        | t1               | 1.717414                                              | 0.010636              |
|                        | A2               | 682.9857                                              | 1444.837              |
|                        | t2               | 1.705352                                              | 0.011175              |
|                        | A3               | -1368.87                                              | 614.8723              |
|                        | t3               | 1.711387                                              | 0.012478              |
| 520                    | y0               | 1.44E-04                                              | 3.37E-05              |
|                        | A1               | 2594.912                                              | 4131.83               |
|                        | t1               | 1.717414                                              | 0.010636              |
|                        | A2               | 2583.297                                              | 5463.726              |
|                        | t2               | 1.705352                                              | 0.011175              |
|                        | A3               | -5178.22                                              | 2312.803              |
|                        | t3               | 1.711387                                              | 0.012478              |
| 540                    | y0               | -2.99E-04                                             | 3.37E-05              |
|                        | A1               | 2576.568                                              | 4102.788              |
|                        | t1               | 1.717414                                              | 0.010636              |
|                        | A2               | 2565.546                                              | 5425.946              |
|                        | t2               | 1.705352                                              | 0.011175              |
|                        | A3               | -5142.13                                              | 2296.994              |
|                        | t3               | 1.711387                                              | 0.012478              |

**R<sup>2</sup>=0.96**

**Table S2: The bi-exponential fitted parameters of transient absorption dynamical curve of Ir (ppy)<sub>3</sub> (pumped wavelength was 355 nm), which does not give reasonable fitting.**

| Wavelength (nm) | Parameter | Value ( $\tau$ in $\mu$ s) | Standard Error |
|-----------------|-----------|----------------------------|----------------|
| 370             | y0        | -0.00107                   | 7.21E-05       |
|                 | A1        | -44.9936                   | 1382.973       |
|                 | t1        | 3.062248                   | 0.039586       |
|                 | A2        | 44.97772                   | 1382.973       |
|                 | t2        | 3.061823                   | 0.03958        |
| 410             | y0        | 3.11E-04                   | 7.23E-05       |
|                 | A1        | 73.9971                    | 2274.979       |
|                 | t1        | 3.062248                   | 0.039586       |
|                 | A2        | -74.0056                   | 2274.979       |
|                 | t2        | 3.061823                   | 0.03958        |
| 520             | y0        | -1.44E-04                  | 7.79E-05       |
|                 | A1        | 273.9078                   | 8421           |
|                 | t1        | 3.062248                   | 0.039586       |
|                 | A2        | -273.936                   | 8421           |
|                 | t2        | 3.061823                   | 0.03958        |
| 540             | y0        | -5.53E-04                  | 7.73E-05       |
|                 | A1        | 259.6686                   | 7983.225       |
|                 | t1        | 3.062248                   | 0.039586       |
|                 | A2        | -259.695                   | 7983.225       |
|                 | t2        | 3.061823                   | 0.03958        |

**R<sup>2</sup>=0.89**

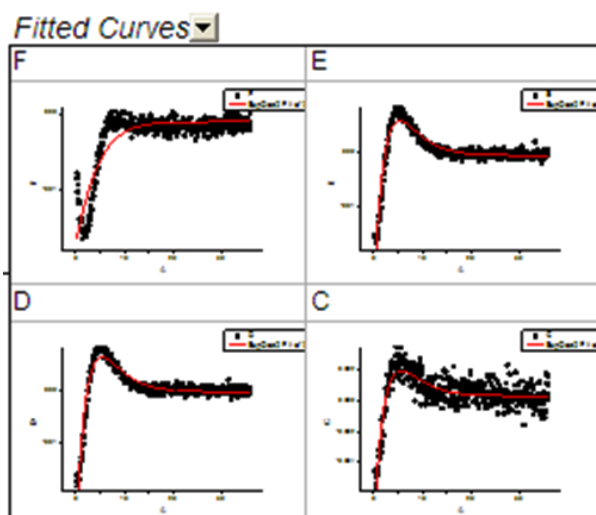

**Fig. S1. The bi-exponential fitted parameters of transient absorption dynamical curves C( 410), D (520), E (540 nm) and F (370 nm), which does not give reasonable fitting.**
